# Supplementary material for: Co-delivery of DNAzyme and a chemotherapy drug using a DNA tetrahedron for enhanced anticancer therapy through synergistic effects
Source: Royal Society of Chemistry journal article supplement (doi:10.1039/c9nj02818h), 2019-01-01
Supplement: c9nj02818h1.pdf [file c9nj02818h1.pdf]

Electronic Supplementary Material (ESI) for New Journal of Chemistry.

Electronic Supplementary Information

## **Co-delivery of DNzyme and chemotherapy drug using DNA tetrahedron for enhanced anticancer therapy through synergistic effects**

**Tao Ren, Zhiwei Deng, Hui Liu, Xiufang Li, Jianbing Li, Jing Yuan, Yao He, Qi Liu, Yanjing Yang\*\* and Shian Zhong\***

College of Chemistry and Chemical Engineering, Central South University, Changsha, 410083, PR China

\* Corresponding author. College of Chemistry and Chemical Engineering, Central South University, Changsha Hunan, 410083 (P.R. China)

E-mail: zhongshian@aliyun.com

\*\* Co-corresponding author. College of Chemistry and Chemical Engineering, Central South University, Changsha Hunan, 410083 (P.R. China)

E-mail: yangyanjing@csu.edu.cn

### **Table of contents:**

|                                                                     |   |
|---------------------------------------------------------------------|---|
| <b>Table S1.</b> Sequences of DNA nanostructures -----              | 2 |
| <b>Figure S1.</b> AFM images of Ap-Td-Dz -----                      | 3 |
| <b>Figure S2.</b> CD spectra of DNA tetrahedron at diverse pH ----- | 4 |
| <b>Figure S3.</b> Standard curve of Dox -----                       | 5 |
| <b>Figure S4.</b> Dox release profiles with time-----               | 6 |
| <b>Figure S5.</b> 15% PAGE analysis at 4 °C -----                   | 7 |
| <b>Figure S6.</b> Study of nuclease digestion resistance -----      | 8 |
| <b>Figure S7.</b> Analysis of miR-21 in SMMC-7721 by qRT-PCR -----  | 9 |

### Supporting Table and Figures

| Strand             | Sequences (5'-3')                                                               |
|--------------------|---------------------------------------------------------------------------------|
| S1                 | GGGTTAGTGTTATGGTTAGGGAGGGTTAGGGTTATGGTTAG<br>TGAGGGTTAGTGTTAGGGTTAGTG           |
| S2                 | CCCTAACCCTAACCCTAACCCATGACGAAGACCTTCTCGGC<br>CGAGAGCGCATGGTGGTTCGGCCA           |
| S3                 | CGGCCGAGAAGGTCTTCGTCAACCCTAACCCTAACCCTAAC<br>CCACACCCTCCGTCCCGGGCGCTC           |
| S4                 | CCCTAACCCTAACCCTAACCCATGGCCGAACCACCATGCGC<br>TCAGAGCGCCCGGGACGGAGGGTG           |
| S2-tail            | CCCTAACCCTAACCCTAACCCATGACGAAGACCTTCTCGGC<br>CGAGAGCGCATGGTGGTTCGGCCATTTTTTTTTT |
| S3-tail            | CGGCCGAGAAGGTCTTCGTCAACCCTAACCCTAACCCTAAC<br>CCACACCCTCCGTCCCGGGCGCTCTTTTATTTTT |
| Aptamer            | ACGCGCGCGCGCATAGCGCGCTGAGCTGAAGATCGTACCGT<br>GAGCGCGTAAAAAAAAA                  |
| DNAzyme            | TCAACATCAGTTCCGAGCCGGTCGAAGATAAGCTAAAAATA<br>AAAA                               |
| Cy5-S1             | Cy5-GGGTTAGTGTTATGGTTAGGGAGGGTTAGGGTTATGGT<br>TAGTGAGGGTTAGTGTTAGGGTTAGTG       |
| miR-21<br>analogue | TAGCTTATC/rA//rG/ACTGATGTTGA                                                    |

**Table S1.** Sequences of DNA nanostructures. The /rA/, /rG/ denote RNA bases.

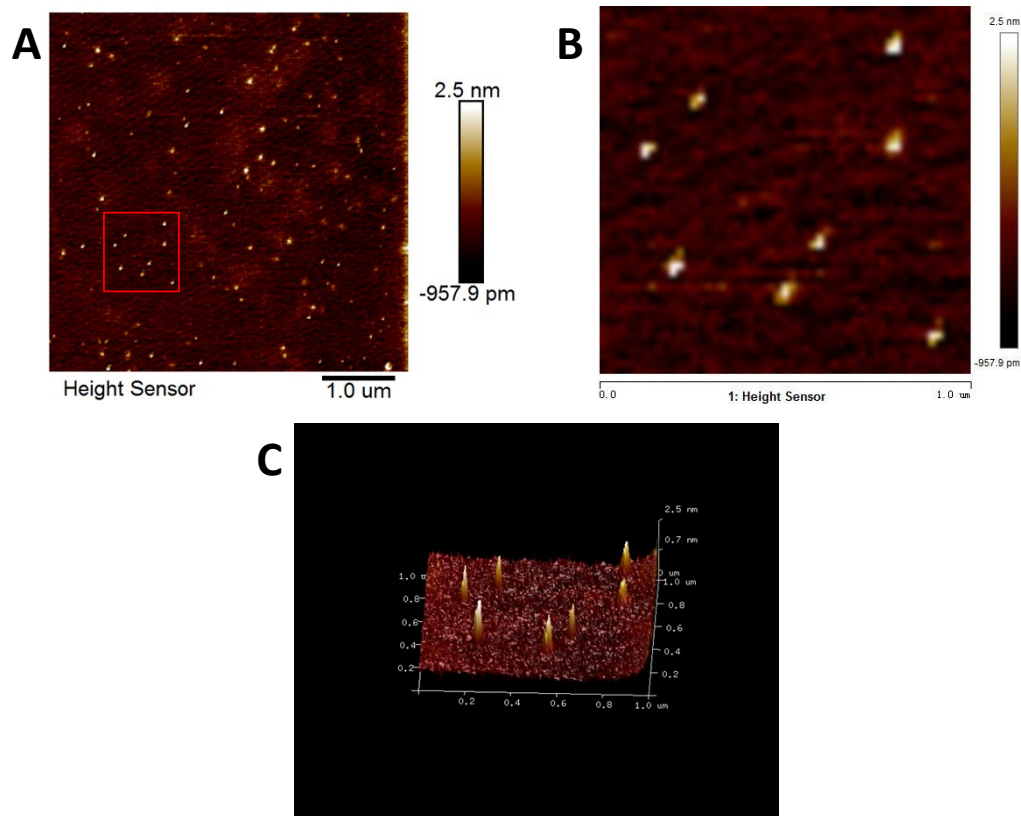

**Figure S1.** AFM images of Ap-Td-Dz. (A) 2D AFM image of Ap-Td-Dz (scale bar: 1 μm). (B) Enlargement of red frame in A with average size 17.3 nm. (C) 3D AFM image of Ap-Td-Dz with height about 2.3 nm.

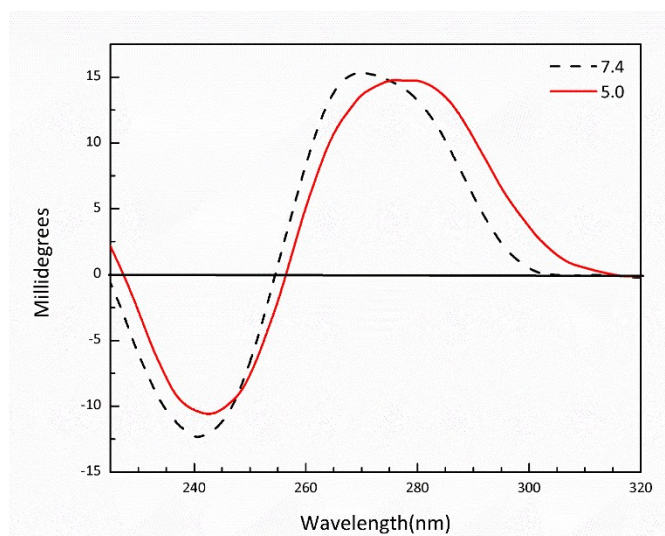

**Figure S2.** CD spectra of DNA tetrahedron at diverse pH. At pH 7.4, the Ap-Td-Dz has a positive peak approximately 265 nm and a negative peak approximately 240 nm. At pH 5.0, the formation of i-motif structure was revealed in a red-shift, with a positive peak around 280 nm and a negative peak around 250 nm.

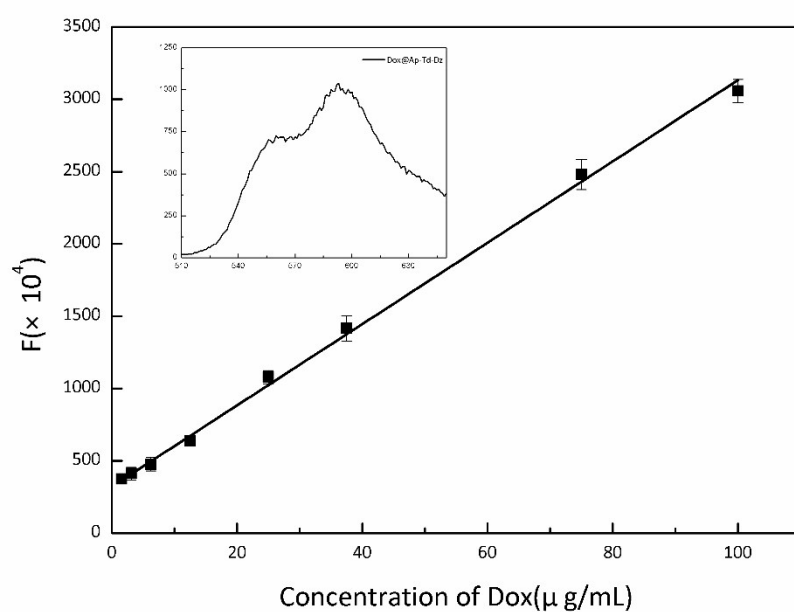

**Figure S3.** Standard curve of Dox derived from measuring the fluorescence of known concentrations of Dox. Fluorescence spectra of Dox@Ap-Td-Dz (initial concentration of Dox: 50  $\mu\text{g/mL}$ ) inside the figure.

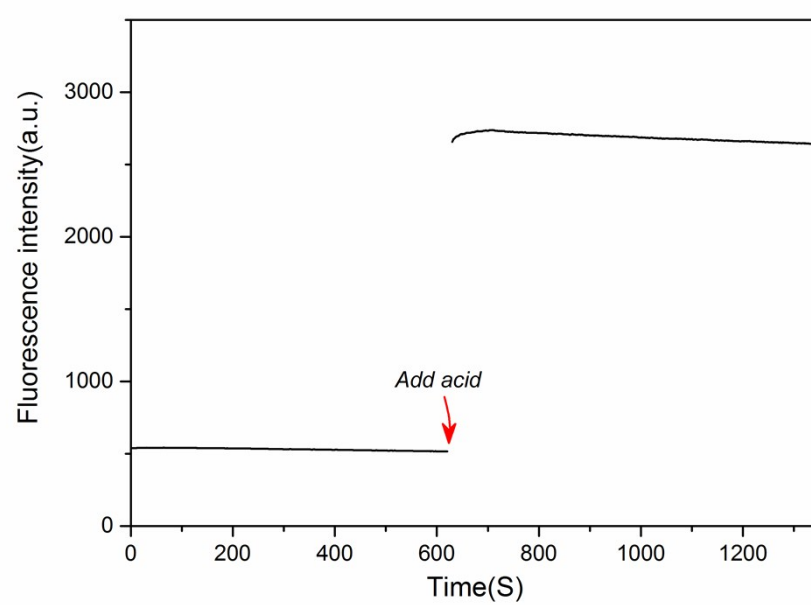

**Figure S4.** Drug release curve in acidic condition with time.

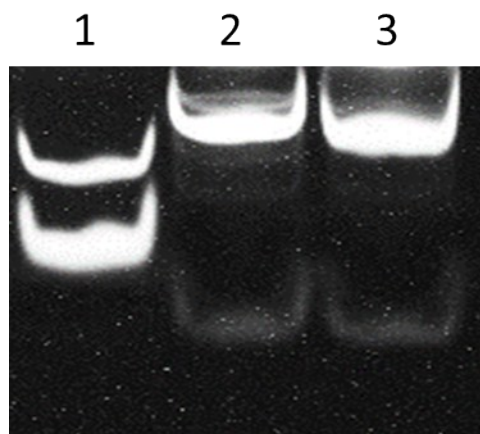

**Figure S5.** 15% PAGE analysis at 4 °C. Lane 1: Td+miR-21 analogue; Lane 2: Ap-Td-Dz+miR-21 analogue; Lane 3: Td-Dz+miR-21 analogue. The results showed distinct cleavage products in lane 2 and 3 separately, while no cleavage was observed in lane 1.

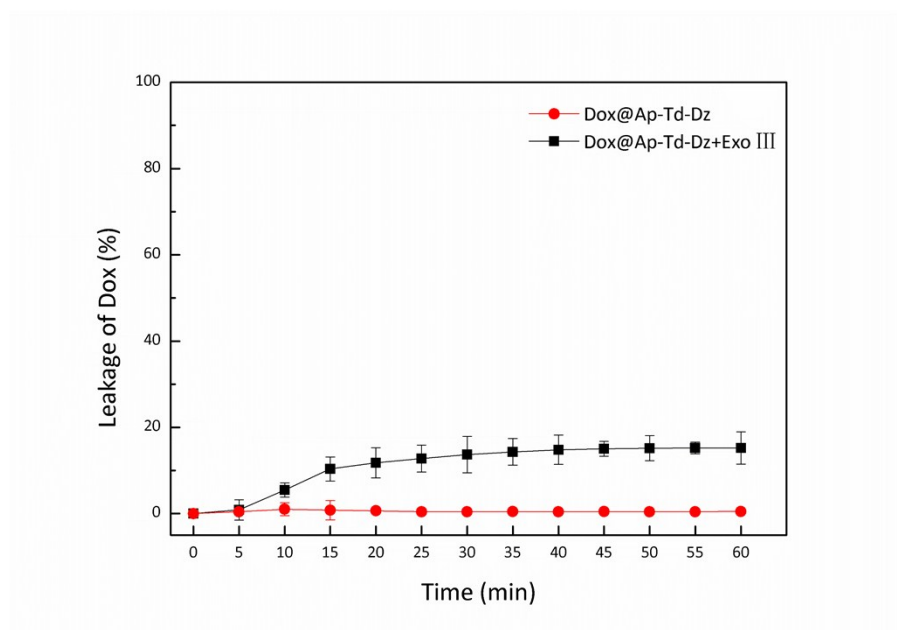

**Figure S6.** Study of nuclease digestion resistance. Investigation for nuclease (Exo III) digestion resistance of DNA drug delivery system.



A

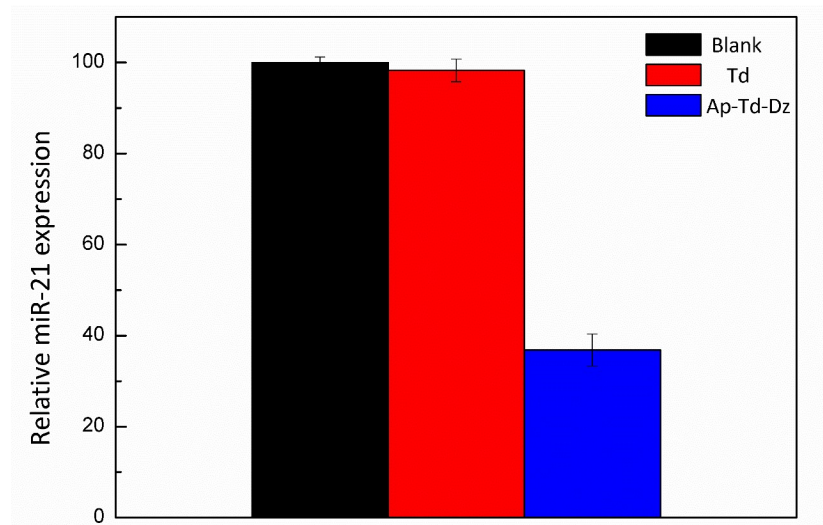

B

| Gene<br>Sample | miRNA21    | U6         | $\Delta Ct$ | $\Delta\Delta Ct$ | $2^{-\Delta\Delta Ct}$ |
|----------------|------------|------------|-------------|-------------------|------------------------|
| Blank          | 16.6893101 | 7.81009054 | 8.87921953  | 0                 | 1                      |
| Td             | 15.9470034 | 7.04271173 | 8.90429163  | 0.0250721         | 0.98277148             |
| Ap-Td-Dz       | 17.9881732 | 7.66830969 | 10.3198635  | 1.440644          | 0.36840292             |

**Figure S7.** Analysis of miR-21 in SMMC-7721 cells by qRT-PCR. (A) The histogram of the qRT-PCR analysis that represents the relative miR-21 level after treated with PBS, Td or Ap-Td-Dz. (B) Average Ct values in qRT-PCR assay of miR-21. The mRNA expression was evaluated by normalizing to the expression of U6 and using the  $2^{-(\Delta\Delta Ct)}$  method.
